# Supplementary material for: Gene interaction perturbation network deciphers a high-resolution taxonomy in colorectal cancer
Source: eLife. 2022 Nov 8;11:e81114. doi: 10.7554/eLife.81114 (PMC9643007; doi:10.7554/eLife.81114)
Supplement: Supplementary file 15. [file elife-81114-supp15.xlsx]

## Sheet: S15
Supplementary File 15. Details of data sources.
Accession number	Platform	Num of patients	Survival information	Treatment information	MSI information	Metastasis information	TP53 mutation	KRAS mutation	BRAF mutation	Use	Source or Database	Data Type	Dataset URL
GSE14333	GPL570	290	Yes	No	No	No	No	No	No	Discovery	Gene Expression Omnibus	Transcriptome	https://www.ncbi.nlm.nih.gov/geo/query/acc.cgi?acc=GSE14333
GSE143985	GPL570	91	Yes	No	Yes	No	Yes	Yes	Yes	Discovery	Gene Expression Omnibus	Transcriptome	https://www.ncbi.nlm.nih.gov/geo/query/acc.cgi?acc=GSE143985
GSE161158	GPL570	250	Yes	No	No	No	No	No	No	Discovery	Gene Expression Omnibus	Transcriptome	https://www.ncbi.nlm.nih.gov/geo/query/acc.cgi?acc=GSE161158
GSE17536	GPL570	177	Yes	No	No	No	No	No	No	Discovery	Gene Expression Omnibus	Transcriptome	https://www.ncbi.nlm.nih.gov/geo/query/acc.cgi?acc=GSE17536
GSE17537	GPL570	55	Yes	No	No	No	No	No	No	Discovery	Gene Expression Omnibus	Transcriptome	https://www.ncbi.nlm.nih.gov/geo/query/acc.cgi?acc=GSE17537
GSE29621	GPL570	65	Yes	No	No	Yes	No	No	No	Discovery	Gene Expression Omnibus	Transcriptome	https://www.ncbi.nlm.nih.gov/geo/query/acc.cgi?acc=GSE29621
GSE31595	GPL570	37	Yes	No	No	No	No	No	No	Discovery	Gene Expression Omnibus	Transcriptome	https://www.ncbi.nlm.nih.gov/geo/query/acc.cgi?acc=GSE31595
GSE38832	GPL570	122	Yes	No	No	No	No	No	No	Discovery	Gene Expression Omnibus	Transcriptome	https://www.ncbi.nlm.nih.gov/geo/query/acc.cgi?acc=GSE38832
GSE39084	GPL570	70	Yes	No	Yes	Yes	Yes	Yes	Yes	Discovery	Gene Expression Omnibus	Transcriptome	https://www.ncbi.nlm.nih.gov/geo/query/acc.cgi?acc=GSE39084
GSE39582	GPL570	585	Yes	Yes|5-FU based ACT	Yes	Yes	Yes	Yes	Yes	Discovery	Gene Expression Omnibus	Transcriptome	https://www.ncbi.nlm.nih.gov/geo/query/acc.cgi?acc=GSE39582
GSE92921	GPL570	59	Yes	No	Yes	No	Yes	Yes	Yes	Discovery	Gene Expression Omnibus	Transcriptome	https://www.ncbi.nlm.nih.gov/geo/query/acc.cgi?acc=GSE92921
GSE72970	GPL570	124	Yes	Yes|5-FU based ACT |Bevacizumab	No	Yes	No	No	No	Discovery	Gene Expression Omnibus	Transcriptome	https://www.ncbi.nlm.nih.gov/geo/query/acc.cgi?acc=GSE72970
GSE28702	GPL570	83	No	Yes|5-FU based ACT	No	No	No	No	No	Discovery	Gene Expression Omnibus	Transcriptome	https://www.ncbi.nlm.nih.gov/geo/query/acc.cgi?acc=GSE28702
GSE45404	GPL570	42	No	Yes|5-FU based ACT	No	No	No	No	No	Discovery	Gene Expression Omnibus	Transcriptome	https://www.ncbi.nlm.nih.gov/geo/query/acc.cgi?acc=GSE45404
GSE52735	GPL570	37	No	Yes|5-FU based ACT	No	No	No	No	No	Discovery	Gene Expression Omnibus	Transcriptome	https://www.ncbi.nlm.nih.gov/geo/query/acc.cgi?acc=GSE52735
GSE62080	GPL570	21	No	Yes|5-FU based ACT	No	No	No	No	No	Discovery	Gene Expression Omnibus	Transcriptome	https://www.ncbi.nlm.nih.gov/geo/query/acc.cgi?acc=GSE62080
GSE69657	GPL570	16	No	Yes|5-FU based ACT	No	No	No	No	No	Discovery	Gene Expression Omnibus	Transcriptome	https://www.ncbi.nlm.nih.gov/geo/query/acc.cgi?acc=GSE69657
GSE19860	GPL570	29	No	Yes|5-FU based ACT |Bevacizumab	No	No	No	No	No	Discovery	Gene Expression Omnibus	Transcriptome	https://www.ncbi.nlm.nih.gov/geo/query/acc.cgi?acc=GSE19860
GSE19862	GPL570	14	No	Yes|Bevacizumab	No	No	No	No	No	Discovery	Gene Expression Omnibus	Transcriptome	https://www.ncbi.nlm.nih.gov/geo/query/acc.cgi?acc=GSE19862
GTEx-CRC	HTseq	308	No	No	No	No	No	No	No	Discovery	The Genotype-Tissue Expression	Transcriptome	https://www.gtexportal.org/
GSE13067	GPL570	74	No	No	Yes	No	No	No	No	Validation	Gene Expression Omnibus	Transcriptome	https://www.ncbi.nlm.nih.gov/geo/query/acc.cgi?acc=GSE13067
GSE13294	GPL570	155	No	No	Yes	No	No	No	No	Validation	Gene Expression Omnibus	Transcriptome	https://www.ncbi.nlm.nih.gov/geo/query/acc.cgi?acc=GSE13294
GSE18088	GPL570	53	No	No	Yes	No	No	No	No	Validation	Gene Expression Omnibus	Transcriptome	https://www.ncbi.nlm.nih.gov/geo/query/acc.cgi?acc=GSE18088
GSE18105	GPL570	111	No	No	No	Yes	No	No	No	Validation	Gene Expression Omnibus	Transcriptome	https://www.ncbi.nlm.nih.gov/geo/query/acc.cgi?acc=GSE18105
GSE33113	GPL570	90	Yes	No	No	No	No	No	No	Validation	Gene Expression Omnibus	Transcriptome	https://www.ncbi.nlm.nih.gov/geo/query/acc.cgi?acc=GSE33113
GSE64256	GPL570	125	No	No	No	Yes	No	No	No	Validation	Gene Expression Omnibus	Transcriptome	https://www.ncbi.nlm.nih.gov/geo/query/acc.cgi?acc=GSE64256
GSE71222	GPL570	152	No	No	No	Yes	No	No	No	Validation	Gene Expression Omnibus	Transcriptome	https://www.ncbi.nlm.nih.gov/geo/query/acc.cgi?acc=GSE71222
GSE104645	GPL6480	193	No	Yes|5-FU based ACT	No	No	No	No	No	Validation	Gene Expression Omnibus	Transcriptome	https://www.ncbi.nlm.nih.gov/geo/query/acc.cgi?acc=GSE104645
GSE106584	GPL17586	156	Yes	No	No	No	No	No	No	Validation	Gene Expression Omnibus	Transcriptome	https://www.ncbi.nlm.nih.gov/geo/query/acc.cgi?acc=GSE106584
GSE131418	GPL15048	174	Yes	No	Yes	Yes	No	No	No	Validation	Gene Expression Omnibus	Transcriptome	https://www.ncbi.nlm.nih.gov/geo/query/acc.cgi?acc=GSE131418
GSE16125	GPL5175	36	Yes	No	No	No	Yes	Yes	No	Validation	Gene Expression Omnibus	Transcriptome	https://www.ncbi.nlm.nih.gov/geo/query/acc.cgi?acc=GSE16125
GSE41258	GPL96	390	Yes	No	Yes	Yes	Yes	No	No	Validation	Gene Expression Omnibus	Transcriptome	https://www.ncbi.nlm.nih.gov/geo/query/acc.cgi?acc=GSE41258
GSE5851	GPL571	80	No	Yes|Cetuximab	No	No	No	No	No	Validation	Gene Expression Omnibus	Transcriptome	https://www.ncbi.nlm.nih.gov/geo/query/acc.cgi?acc=GSE5851
GSE75315	GPL5175	211	No	No	Yes	No	No	Yes	Yes	Validation	Gene Expression Omnibus	Transcriptome	https://www.ncbi.nlm.nih.gov/geo/query/acc.cgi?acc=GSE75315
TCGA-CRC	HTseq	584	Yes	No	No	Yes	Yes	Yes	Yes	Validation	The Cancer Genome Atlas	Transcriptome	https://portal.gdc.cancer.gov/
GSE26682	GPL96 & GPL570	331	No	No	Yes	No	No	No	No	Validation	Gene Expression Omnibus	Transcriptome	https://www.ncbi.nlm.nih.gov/geo/query/acc.cgi?acc=GSE26682
GSE24551	GPL5175 & GPL11028	320	Yes	No	Yes	No	No	No	No	Validation	Gene Expression Omnibus	Transcriptome	https://www.ncbi.nlm.nih.gov/geo/query/acc.cgi?acc=GSE24551
GSE12945	GPL96	62	Yes	No	No	Yes	No	No	No	Validation	Gene Expression Omnibus	Transcriptome	https://www.ncbi.nlm.nih.gov/geo/query/acc.cgi?acc=GSE12945
GSE21510	GPL570	123	No	No	No	Yes	No	No	No	Validation	Gene Expression Omnibus	Transcriptome	https://www.ncbi.nlm.nih.gov/geo/query/acc.cgi?acc=GSE21510
GSE78220	GPL11154	27	Yes	Yes|Immutherapy						Exploration	Gene Expression Omnibus	Transcriptome	https://www.ncbi.nlm.nih.gov/geo/query/acc.cgi?acc=GSE78220
GSE176307	GPL24014	89	Yes	Yes|Immutherapy						Exploration	Gene Expression Omnibus	Transcriptome	https://www.ncbi.nlm.nih.gov/geo/query/acc.cgi?acc=GSE176307
IMvigor210	HTseq	298	Yes	Yes|Immutherapy						Exploration	Mariathasan et al.	Transcriptome	https://doi.org/10.1038/nature25501
TCGA-CRC	Proteome									Exploration	The Cancer Genome Atlas	Multi-omics	https://portal.gdc.cancer.gov/
TCGA-CRC	WES									Exploration	The Cancer Genome Atlas	Multi-omics	https://portal.gdc.cancer.gov/
TCGA-CRC	CNV									Exploration	The Cancer Genome Atlas	Multi-omics	https://portal.gdc.cancer.gov/
TCGA-CRC	Methylation									Exploration	The Cancer Genome Atlas	Multi-omics	https://portal.gdc.cancer.gov/
CCLE	Transcriptome (GPL15308)									Exploration	The Cancer Cell Line Encyclopedia	Multi-omics	https://sites.broadinstitute.org/ccle
CCLE	Metabolomics									Exploration	The Cancer Cell Line Encyclopedia	Multi-omics	https://sites.broadinstitute.org/ccle
GSE35144	GPL570 (Human+PDX)	27 pairs	No	No	No	No	No	No	No	Exploration	Gene Expression Omnibus	Transcriptome	https://www.ncbi.nlm.nih.gov/geo/query/acc.cgi?acc=GSE35144
GSE73255	GPL6947 (Human)	116	No	No	No	No	No	No	No	Exploration	Gene Expression Omnibus	Transcriptome	https://www.ncbi.nlm.nih.gov/geo/query/acc.cgi?acc=GSE73255
GSE76402	GPL10558 (PDX)	116	No	No	No	No	No	No	No	Exploration	Gene Expression Omnibus	Transcriptome	https://www.ncbi.nlm.nih.gov/geo/query/acc.cgi?acc=GSE76402
GSE56699	GPL14951	72	No	Yes|Radiotherapy	No	No	No	No	No	Exploration	Gene Expression Omnibus	Transcriptome	https://www.ncbi.nlm.nih.gov/geo/query/acc.cgi?acc=GSE56699
GSE81861	GPL11154 (Single cell data)									Exploration	Gene Expression Omnibus	Transcriptome	https://www.ncbi.nlm.nih.gov/geo/query/acc.cgi?acc=GSE81861
GDSC	https://www.cancerrxgene.org/			Yes						Exploration	Genomics of Drug Sensitivity in Cancer	Drug Sensitivity	https://www.cancerrxgene.org/
CTRP	https://portals.broadinstitute.org/ctrp/			Yes						Exploration	Cancer Therapeutics Response Portal	Drug Sensitivity	https://portals.broadinstitute.org/ctrp/
PRISM	https://www.theprismlab.org/			Yes						Exploration	Profiling Relative Inhibition Simultaneously in Mixtures	Drug Sensitivity	https://www.theprismlab.org/
